# Supplementary material for: Investigating the Disordered and Membrane-Active Peptide A-Cage-C Using Conformational Ensembles
Source: Molecules. 2021 Jun 12;26(12):3607. doi: 10.3390/molecules26123607 (PMC8231226; doi:10.3390/molecules26123607)
Supplement: Supplementary file 1 [file molecules-26-03607-s001.zip]

Archive with 6 entries (6 files):
- Figure S1 pH 7 with-without bicelle HSQC.png
- Figure S2 CSP pH 7 to pH 4.5.png
- Figure S3 DBI and pSF.png
- Figure S4 full clustering absence presence of bicelles.png
- Figure S5 compt and ext water MD.png
- Supplementary Information For Dobrovolska et al MDPI.pdf
